# Supplementary material for: Antibacterial, antifungal, and antibiofilm activities of biogenic zinc nanoparticles against pathogenic microorganisms
Source: Frontiers journal article supplement (doi:10.3389/fcimb.2025.1545119), 2025-07-14
Supplement: Data_Sheet_1.pdf [file Data_Sheet_1.pdf]

Supplementary Material 1

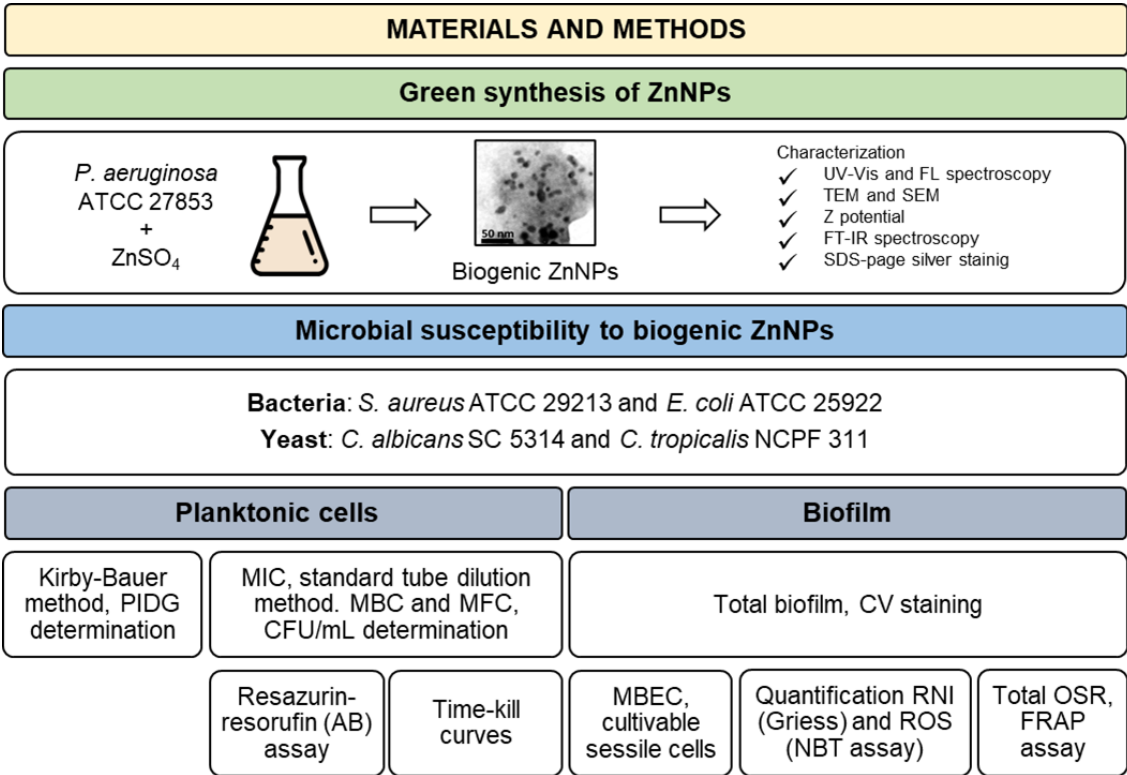

Figure S1. Schematic summary of materials and methods.
